# 1 ***Hybridizing salamanders experience accelerated diversification***

2 Austin H. Patton<sup>1,\*</sup>, Mark J. Margres<sup>1,2</sup>, Brendan Epstein<sup>1,3</sup>, Jon Eastman<sup>1</sup>, Luke J. Harmon<sup>4</sup>, and  
3 Andrew Storfer<sup>1</sup>

4  
5 <sup>1</sup>Washington State University, School of Biological Sciences, Pullman, WA, 99164, USA

6 <sup>2</sup>Harvard University, Department of Organismic and Evolutionary Biology, Cambridge, MA, 02138, USA

7 <sup>3</sup>University of Minnesota, College of Biological Sciences, Saint Paul, MN, 55108, USA

8 <sup>4</sup>University of Idaho, Department of Biological Sciences and IBEST, Moscow, ID, 83844, USA

9 \*austin.patton@wsu.edu

10

## 11 **ABSTRACT**

12 **Whether hybridization generates or erodes species diversity has long been debated, but to**  
13 **date most studies have been conducted at small taxonomic scales. Salamanders (order**  
14 **Caudata) represent a taxonomic order in which hybridization plays a prevalent ecological**  
15 **and evolutionary role. We employed a recently developed model of trait-dependent**  
16 **diversification to test the hypothesis that hybridization impacts the diversification**  
17 **dynamics of species that are currently hybridizing. We find strong evidence supporting this**  
18 **hypothesis, showing that hybridizing salamander lineages have significantly greater net-**  
19 **diversification rates than non-hybridizing lineages. This pattern is driven by concurrently**  
20 **increased speciation rates and decreased extinction rates in hybridizing lineages. Our**  
21 **results support the hypothesis that hybridization can act as a generative force in**  
22 **macroevolutionary diversification.**

23

24

25

26

27

28

## 29 **Introduction**

30 A leading unresolved question in evolutionary biology is whether hybridization, defined as the  
31 interbreeding between two genetically distinct lineages<sup>1</sup>, acts as a creative or destructive  
32 evolutionary force<sup>2-6</sup>. The prevailing view in the animal literature is that hybridization constrains  
33 lineage diversification because hybrid lineages are often documented to be less fit than  
34 parentals<sup>4,5,7</sup>. Under this scenario, hybridization is predicted to increase extinction rates. Further,  
35 introgressive hybridization has the potential to “wash away” accumulating divergence among  
36 incompletely isolated lineages<sup>8-10</sup>, leading to a prediction of decreased speciation rates. In  
37 contrast, the prevailing view in the plant literature is that hybridization enhances adaptive  
38 potential by introducing novel genetic and phenotypic variation<sup>11-13</sup>. Reinforcement, or the  
39 accumulation of post-zygotic reproductive isolation through selection against hybrids<sup>14</sup>, has long  
40 been considered to expedite the speciation of diverging lineages<sup>9</sup>. Reinforcement has the  
41 potential to act even when heterosis occurs, as hybrids may be largely sterile, such as in *Triturus*  
42 newts<sup>15,16</sup>. Additionally, hybridization-mediated shuffling of old genetic variants may fuel rapid  
43 diversification, as outlined by the combinatorial view of speciation<sup>17</sup>. Accordingly, hybridization  
44 is predicted to increase speciation rates and/or decrease extinction rates.

45       Whereas evidence of hybrid speciation in plants has long been abundant, evidence for  
46 widespread hybrid speciation in animals is relatively scarce<sup>6,10,18-21</sup>. In allopolyploid hybrid  
47 speciation, a mode of speciation common in plants but rare in animals, nearly complete  
48 reproductive isolation may evolve in a single generation due to a change in ploidy<sup>11</sup>. In contrast,  
49 homoploid hybrid speciation typically has to occur in the face of continued gene flow, which acts  
50 to homogenize the diverging hybrid lineages<sup>10</sup>.

51       Interest in hybrid-mediated speciation has recently burgeoned, but studies have typically

52 been limited in taxonomic scope. Studies of the effect of hybridization on diversification have  
53 most commonly been conducted among closely related pairs or small clades of taxa, and results  
54 have been equivocal<sup>1,22–28</sup>. Additionally, studies of hybridization often occur along different  
55 stages of the speciation continuum<sup>29</sup>, whereby hybridization can appear as a force that either  
56 facilitates or impedes speciation. Recent work highlights this uncertainty by demonstrating that  
57 the outcomes of hybridization depend on the underlying nature of selection pressures and  
58 demography<sup>30</sup>. We suggest that studies at broad phylogenetic and macroevolutionary timescales  
59 can help overcome these limitations by providing a phylogenetic context in which to view  
60 repeated hybridization events over evolutionary timescales and the consequent impact on lineage  
61 diversification rates.

62 Here, we conduct a taxonomically-broad test of the relationship of hybridization with  
63 macroevolutionary diversification rates. We study salamanders (order Caudata, ca. 716 spp as of  
64 October 2018<sup>31</sup>), which are particularly suitable for this study because hybridization is pervasive  
65 and has been studied extensively (i.e., nearly 1/3 of N. American species hybridize:  
66 Supplementary Fig. S1, Supplementary Table S1). Additionally, sufficient sequence data are  
67 available to resolve the phylogenetic relationships among most (~63%) taxa within this group<sup>32</sup>.

68 Salamanders present a valuable case study of hybridization, as numerous groups are  
69 comprised of speciose, yet morphologically and ecologically conservative species<sup>23,33–38</sup>. As a  
70 consequence of this frequent morphological and ecological conservatism, many species have  
71 come to be described on the basis of molecular differentiation (e.g. <sup>39–44</sup>). Many salamander  
72 groups have diversified through primarily non-ecological means of speciation (i.e. <sup>23,33,35,45–48</sup>).  
73 Salamander species have often diverged in allopatry/parapatry following restriction to refugial,  
74 isolated populations during periods of climatic fluctuations or via orogeny of mountain ranges

75 (e.g. <sup>49–51</sup>). Following the evolution of incomplete reproductive isolation, young, diverging  
76 lineages may then come into secondary contact and hybridize (e.g. <sup>23</sup>). If salamanders are indeed  
77 predisposed to the evolution of incomplete reproductive isolation, then hybridization may play  
78 an important role in their diversification.

79       If hybridization plays a meaningful role in the diversification process, differences in  
80 diversification rates among hybridizing and non-hybridizing taxa are expected. Thus, we test the  
81 hypothesis that there is a difference in diversification rates (speciation and extinction rates)  
82 between contemporaneously hybridizing and non-hybridizing salamander lineages. Note that we  
83 are simply testing whether contemporary hybridization influences diversification rates, not  
84 whether ancient hybridization facilitated the present radiation as postulated by the hybrid swarm  
85 hypothesis<sup>6,52</sup>, because our experimental design cannot address this (See supplement). We  
86 replicate this test across four datasets to investigate the robustness of our results: 1) including all  
87 available data; 2) exclusion of species that do not exhibit sympatry (defined as <10% geographic  
88 range overlap) thereby lacking the opportunity to hybridize; 3) only the family Plethodontidae,  
89 which are the most widely hybridizing and diverse of the 10 salamander families; 4) all (nine)  
90 salamander families except the Plethodontidae.

91

## 92 **Materials and Methods**

### 93 *Data Collection*

94 We used the time-calibrated phylogeny of Amphibia<sup>32</sup> as the source for downstream analyses.  
95 This tree<sup>32</sup> was constructed using nine nuclear genes and three mitochondrial genes as data using  
96 RAxMLv7.2.8<sup>53</sup>, and time-calibrated using treePL<sup>54</sup>. Using the APE package (v.3.4<sup>55</sup>) in R, we  
97 extracted the subtree containing salamanders for subsequent analyses. This approach yielded a

98 tree containing 469 of 716 extant species of salamanders (Supplementary Fig. S1<sup>32</sup>) representing  
99 approximately two-thirds of the known diversity.

100 Each species was scored as ‘non-hybridizable’ (NH) or ‘hybridizable’ (H), based on an  
101 extensive literature review of hybridization using the search engines Google Scholar and ISI  
102 Web of Knowledge. To do so we paired each species with the terms ‘hybrid’ and ‘introgress’ as  
103 well as dialectical and structural variants thereof (e.g., ‘hybridization’, ‘introgressed’) to search  
104 for cases of hybridization. Criteria for hybridizability under the first, “narrow” definition were  
105 the documentation of hybridization among natively distributed species, specifically the  
106 observation of heterospecific mating or hybrid offspring in the wild as detected by substantial  
107 and repeated morphological *and* molecular intermediacy. Criteria for hybridizability under the  
108 second, “broad” definition included those criteria described previously, as well as: 1) the  
109 observation of hybridization occurring in laboratory settings or among introduced and native  
110 species, and/or; 2) inference of historical introgression as determined using molecular lines of  
111 evidence (e.g. substantial and replicated genealogical discordance among molecular markers or  
112 detection via Approximate Bayesian Computation methods). This latter definition is less  
113 conservative than the former. We excluded cases where one or two individuals exhibited cyto-  
114 nuclear discordance between markers such as allozymes and mtDNA (as observed for members  
115 of *Sirenidae*<sup>56</sup>, and several Hynobiids<sup>57–60</sup>), as we did not perceive these cases to meet the criteria  
116 of substantial and replicated genealogical discordance. Although inference of hybridization via  
117 the detection of genealogical discordance warrants caution, our narrow definition of  
118 hybridization does not recognize these species as hybridizable. In total, we retrieved 56 papers  
119 (date-range: 1957-2017: Supplementary Table S1). We confirmed hybridization for roughly 11  
120 and 13 percent of extant Caudates for the narrow and broad datasets, respectively (78 and 92 of

121 716 species: 17 and 20 percent of sampled taxa; Supplementary Table S1). Documented  
122 hybridization was absent from four families (Cryptobranchidae, Sirenidae, Proteidae,  
123 Rhyacotritonidae) in the narrow dataset and two families (Rhyacotritonidae, Sirenidae) in the  
124 broad dataset.

125 In addition to analyzing the entire salamander subclade from the Pyron<sup>32</sup> amphibian  
126 phylogeny (469 total species), we compared diversification rates using three additional datasets,  
127 produced using both the narrow and broad datasets (i.e., for a total of eight datasets). In the first  
128 dataset, we required that “non-hybridizable” taxa were sympatric (>10% range overlap) with  
129 another species, thus possessing sufficient opportunity to hybridize. Consequently, species that  
130 were not sympatric with any other salamander taxa were excluded from the dataset. Therefore,  
131 species classified as non-hybridizing in this analysis may have limited opportunity to hybridize  
132 but have not been observed to do so. Although we cannot account for historical species  
133 distributions (e.g. species’ ranges may have previously overlapped), our primary (narrow)  
134 definition of hybridizability necessitates contemporary hybridization. Thus, our designation of  
135 sympatry occurs at the same time scale as our designation of hybridizability.

136 In the second and third datasets, we tested for a family-specific effect of hybridization on  
137 diversification rates. As plethodontids are the most diverse family of salamanders (Fig. 1B) and  
138 have been the subject of extensive study<sup>37</sup>, the greatest number of instances of hybridization have  
139 been documented in this group (Table S1). Additionally, many plethodontids of the genus  
140 *Plethodon* in the Eastern United States have been described as species on the basis of a threshold  
141 genetic distance (e.g. <sup>39–42</sup>). Coincidentally, nearly half of these species have been observed to  
142 hybridize in nature. To test for an effect of this relative taxonomic oversplitting, we excluded the  
143 *Plethodon glutinosus* group (Figure 1B) and repeated analyses under both the narrow and broad

144 definitions of hybridization (see Supplement for additional details). Thus, we produced datasets  
145 including either only members of family Plethodontidae, or the nine families that exclude  
146 plethodontid salamanders. In total, ten analyses were conducted, using five trees for each of the  
147 narrow and broad datasets, respectively. Information on the total number of species included in  
148 each tree, as well as the number of species in each state (i.e., H or NH) may be found in  
149 Supplementary Table S1.

### 150 *Assessment of Trait Dependent Diversification*

151 We applied the HiSSE (Hidden State Speciation & Extinction<sup>61</sup>) trait-dependent diversification  
152 model to test for differences in speciation and extinction rates between hybridizing and non-  
153 hybridizing lineages. HiSSE infers speciation and extinction rates for a binary character while  
154 allowing for heterogeneity in diversification rate to exist within each character state. In the  
155 HiSSE model, hidden states are co-distributed with the trait of interest and account for  
156 unsampled traits that may simultaneously contribute to the diversification process. The hidden  
157 state need not be associated with any single trait but may instead be associated with a set of traits  
158 or suite of traits. Inclusion of the hidden state thus ameliorates the confounding effects of  
159 unsampled traits on diversification rate estimations by allowing for greater rate heterogeneity in  
160 the tree than in previous SSE models<sup>61</sup>. Thus, we are in essence measuring the impact of  
161 contemporary hybridization while controlling for other, correlated traits on diversification rate.  
162 Finally, by accounting for increased rate heterogeneity in character-dependent and character-  
163 independent (null) models through the inclusion of hidden states, model rejection properties are  
164 greatly improved<sup>61</sup> relative to previous SSE models.

165 We evaluated a total of 14 competing models using HiSSE, half of which represent a  
166 model of character-dependent diversification and the remaining half represented models of

167 character independence (Supplementary Tables S2-S9). Models of trait dependence varied in the  
168 number of hidden states included and in the number of free transitions among states. In  
169 character-dependent models, our four states where Hybridizing (H) and Non-hybridizing (NH),  
170 each being associated with one of the two hidden state (A & B) for four total character  
171 states/diversification regimes (H-A, H-B, NH-A, NH-B).

172         Additionally, to account for the fact that diversification rates may be biased by  
173 incomplete sampling of extant diversity within a phylogeny<sup>62-64</sup>, we assume that 20% of extant  
174 species of salamanders hybridize in nature. This value was chosen because it approximately  
175 equals the mean frequency of hybridization across our datasets (19.75). To explore the effect this  
176 assumption had on our results, we repeated these analyses assuming 1) we have sampled all  
177 extant hybridizing species (Supplementary Fig. S2), 2) our sampling of character states is  
178 proportional to their prevalence in nature (Supplementary Fig. S3), and 3) that 30% of extant  
179 species hybridize (Supplementary Fig. S4). Thus, while unable to designate all hybridizing taxa  
180 as such in our phylogeny due to their not being represented in the literature, we have explicitly  
181 addressed this uncertainty in our analysis. We elaborate upon our choice of sampling fractions in  
182 the Supplementary Materials.

183         To assess whether the inclusion of extremely young species impacted our diversification  
184 rate estimates, we ran a single analysis excluding species younger than 1MY, as per Beaulieu &  
185 O'Meara<sup>61</sup> using the narrow dataset and all species. This in turn led to the removal of 14 species.  
186 Results were qualitatively identical to those obtained including these young species, so all  
187 subsequent analyses were conducted including them. To improve the performance of the  
188 Maximum Likelihood optimization procedure implemented in HiSSE, we used simulated  
189 annealing to first traverse the likelihood surface to identify optimal starting values for subsequent



190 ML-optimization. Rather than reporting the results of individual model fits, we instead take the  
191 approach of investigating model-averaged parameter estimates for each sampled character state<sup>65</sup>  
192 (see Supplementary Information for further justification). That is, parameter estimates obtained  
193 from each fitted model are averaged together such that their contribution to the average is  
194 proportional to their relative support (Akaike weights) among the set of candidate models  
195 (Supplementary Table S13). This leads the best supported models to have the greatest impact on  
196 the final model averaged parameter estimates. Diversification rates are returned for each sampled  
197 state respectively, as not all models include hidden states.

198         To test for significance among diversification rates inferred for each state, we calculated  
199 all possible ratios between non-hybridizing and hybridizing species' model-averaged parameter  
200 estimates and calculating the proportion of comparisons in which the value for the non-  
201 hybridizing lineage is greater than that of hybridizing lineage. Thus, we obtain empirical P-  
202 values (reported in Supplementary Table S14) in which a value of 0 means in every comparison,  
203 hybridizing lineages were inferred to have rates greater than those of non-hybridizing lineages,  
204 and vice versa. This test is extremely conservative and tests the null hypothesis that non-  
205 hybridizing species always experience diversification rates greater than hybridizing species.

206         In summary, four phylogenies (all species, sympatric species, plethodontids, & non-  
207 plethodontids) were analyzed using two datasets (narrow & broad definitions of hybridization).  
208 Each data/tree-set combination was tested assuming the three aforementioned differences in  
209 prevalence of hybridization in nature. In all, a total of 32 rounds of model testing were  
210 performed, comparing seven models of trait-independent diversification and seven models of  
211 trait-dependent diversification for each sampling fraction. Further information on how these  
212 data/tree-sets were produced and analyzed may be found in the Supplementary Materials. Lastly,

213 a description of our test of sensitivity to phylogenetic uncertainty may also be found in the  
214 Supplement (Supplementary Fig. S6 & S7; Supplementary Table S15)

215 To complement our HiSSE analyses in a manner that is largely insensitive to the  
216 potentially confounding relationship between branch lengths and propensity to hybridize (see  
217 discussion), we conducted sister clade comparisons. Specifically, using all comparisons of three  
218 or more taxa (i.e. two sister species hybridize, and the sister lineage does not), we used the  
219 method of Barraclough, Harvey and Nee<sup>66</sup> to test the hypothesis that hybridizing clades had  
220 greater richness than non-hybridizing clades. To assess confidence, 1000 permutations of  
221 contrast signs were conducted. This test was repeated for each of the eight datasets described  
222 above (Supplementary Table S16).

223 To test for possible circularity of causality between diversification rates, species richness  
224 and opportunity to hybridize, we quantified the relationships between the three. Specifically, we  
225 tested for a relationship between 1) mean diversification rates and the proportion family  
226 hybridizing, 2) mean diversification rates and species richness, and 3) proportion family  
227 hybridizing and species richness (Supplementary Fig. S8). All analyses were conducted at the  
228 family level, and mean diversification rates were obtained using lineage-specific model-averaged  
229 diversification (speciation, extinction, net-diversification) rates. Simple linear regressions were  
230 conducted in R v3.6.1<sup>67</sup>.

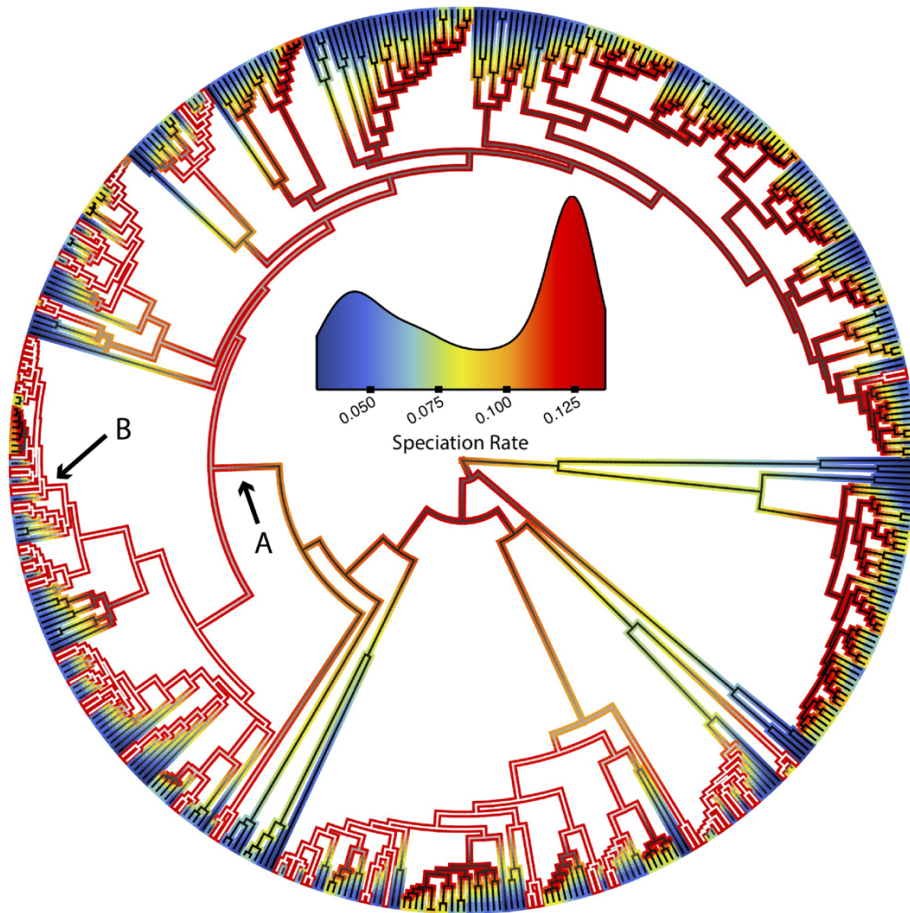

231  
232 **Figure 1. Inferred speciation rate along the salamander phylogeny for both hybridizing and**  
233 **non-hybridizing species.** Branch outlines depict speciation rates corresponding to the inset  
234 density plot. Branch interiors depict the probability that a lineage is hybridizable (white) or non-  
235 hybridizable (black). The arrow labeled **A** denotes family Plethodontidae, and the arrow labeled **B**  
236 denotes the *Plethodon glutinosus* group.

237

## 238 Results

239 Across both datasets (narrow and broad) assuming 20% of species hybridize, three of four  
240 analyzed phylogenies consistently found that hybridizing species experience increased speciation  
241 rates, decreased extinction rates, and therefore increased net-diversification rates (all significant:  
242 Figs. 1, 2 & 3; Tables 1, 2, Supplementary Tables S6 & S7). Net-diversification of hybridizing  
243 lineages in these trees were on average 4X greater than that of non-hybridizing lineages. Our

244 results were insensitive to phylogenetic uncertainty (Supplementary Fig. S7; Supplementary  
245 Table S15).

246

| Dataset | Tree              | Speciation $\lambda$    |                 | Extinction $\mu$  |                          | Net Diversification $r = \lambda - \mu$ |                 | Extinction Fraction $\xi = \mu \div \lambda$ |                          | Turnover $\tau = \lambda + \mu$ |                 |
|---------|-------------------|-------------------------|-----------------|-------------------|--------------------------|-----------------------------------------|-----------------|----------------------------------------------|--------------------------|---------------------------------|-----------------|
|         |                   | H                       | NH              | H                 | NH                       | H                                       | NH              | H                                            | NH                       | H                               | NH              |
| Narrow  | All Species       | <b>0.124 ± 5.90e-4</b>  | 0.055 ± 1.69e-3 | 9.39e-3 ± 8.62e-5 | <b>0.038 ± 8.36e-4</b>   | <b>0.115 ± 5.04e-4</b>                  | 0.017 ± 2.54e-3 | 0.076 ± 3.20e-4                              | <b>0.794 ± 0.036</b>     | <b>0.134 ± 6.76e-4</b>          | 0.094 ± 8.60e-4 |
|         | Sympatric Species | <b>0.111 ± 8.140e-3</b> | 0.042 ± 1.73e-3 | 8.57e-4 ± 8.68e-5 | <b>9.45e-3 ± 3.5e-4</b>  | <b>0.110 ± 8.04e-3</b>                  | 0.032 ± 2.08e-3 | 7.54e-3 ± 1.53e-4                            | <b>0.283 ± 0.020</b>     | <b>0.112 ± 8.22e-3</b>          | 0.051 ± 1.38e-3 |
|         | Plethodontids     | <b>0.098 ± 5.50e-6</b>  | 0.041 ± 1.48e-3 | 4.26e-4 ± 1.20e-8 | <b>0.014 ± 7.66e-4</b>   | <b>0.098 ± 5.48e-6</b>                  | 0.028 ± 2.24e-3 | 4.35e-3 ± 1.63e-7                            | <b>0.435 ± 0.051</b>     | <b>0.098 ± 5.50e-6</b>          | 0.055 ± 7.12e-4 |
|         | Non-Plethodontids | <b>0.078 ± 3.38e-3</b>  | 0.041 ± 1.73e-3 | 1.89e-3 ± 4.92e-5 | <b>0.039 ± 7.88e-4</b>   | <b>0.076 ± 3.42e-3</b>                  | 2.2e-3 ± 2.5e-3 | 0.025 ± 1.19e-3                              | <b>1.040 ± 0.066</b>     | 8.00e-2 ± 3.32e-3               | 0.080 ± 9.80e-4 |
|         |                   |                         |                 |                   |                          |                                         |                 |                                              |                          |                                 |                 |
| Broad   | All Species       | <b>0.117 ± 2.72e-3</b>  | 0.053 ± 2.04e-3 | 2.39e-3 ± 1.55e-4 | <b>0.027 ± 7.24e-4</b>   | <b>0.115 ± 2.88e-3</b>                  | 0.026 ± 2.74e-3 | 0.021 ± 1.95e-3                              | <b>0.647 ± 0.039</b>     | <b>0.120 ± 2.58e-3</b>          | 0.080 ± 1.37e-3 |
|         | Sympatric Species | <b>0.106 ± 4.60e-3</b>  | 0.047 ± 1.85e-3 | 3.02e-3 ± 1.64e-4 | <b>0.027 ± 1.10e-3</b>   | <b>0.103 ± 4.74e-3</b>                  | 0.019 ± 2.96e-3 | 0.031 ± 2.04e-3                              | <b>0.732 ± 0.057</b>     | <b>0.109 ± 4.46e-3</b>          | 0.074 ± 7.58e-4 |
|         | Plethodontids     | <b>0.143 ± 1.79e-4</b>  | 0.049 ± 1.64e-3 | 3.48e-6 ± 1.33e-6 | <b>1.40e-3 ± 6.66e-5</b> | <b>0.143 ± 1.78e-4</b>                  | 0.048 ± 1.70e-3 | 2.42e-5 ± 9.24e-6                            | <b>0.033 ± 2.26e-3</b>   | <b>0.143 ± 1.80e-4</b>          | 0.051 ± 1.57e-3 |
|         | Non-Plethodontids | <b>0.071 ± 5.42e-3</b>  | 0.072 ± 2.88e-3 | 1.44e-4 ± 1.04e-5 | <b>1.66e-4 ± 3.72e-7</b> | <b>0.071 ± 5.42e-3</b>                  | 0.072 ± 2.88e-3 | 2.38e-3 ± 4.80e-4                            | <b>2.60e-3 ± 2.52e-4</b> | 0.071 ± 5.42e-3                 | 0.072 ± 2.88e-3 |
|         |                   |                         |                 |                   |                          |                                         |                 |                                              |                          |                                 |                 |

247  
248

249 **Table 1. Model-averaged diversification rate estimates at the tips of the phylogeny ± 2 SE.**  
250 Results assume 20% of extant species hybridize. Bold indicate parameter estimates that differ  
251 significantly among character states, with the boldened values as the larger rate estimate.  
252 Significance was determined by calculating all possible ratios between non-hybridizing and  
253 hybridizing species' model-averaged parameter estimates and calculating the proportion of  
254 comparisons in which the value for the non-hybridizing lineage is greater than that of hybridizing  
255 lineage. This comparison thus produced an empirical P-value with which significance could be  
256 determined.

257

258 In all cases of inferred trait dependent diversification, a HiSSE model was the best  
259 supported (Supplementary Tables S2-S9). Of these HiSSE models, two groups emerged: one in  
260 which hybridizing species did not harbor a second hidden state (All Species – Narrow,  
261 Plethodontids – Narrow & Broad), and one in which both hybridizing and non-hybridizing taxa  
262 had two hidden states (Table 2). The former of these (without a second hidden state for  
263 hybridizing taxa) is interpretable as meaning that there is less diversification rate heterogeneity  
264 experienced by hybridizing taxa than by non-hybridizing taxa. Interestingly, non-hybridizing  
265 taxa were sometimes inferred to have slightly negative net-diversification rates (Table 2). In the  
266 case of the best-fit model using all taxa assuming 20% of species hybridize, this leads to an

267 expected waiting time of 128 million years before the next net-loss in diversity. These negative  
268 rates are not persistent however; examination of ancestral state reconstructions indicates that the  
269 hidden state responsible (NH-B) for these rates is distributed primarily along the tips  
270 (Supplementary Figs S9 – S12).

271 As the average magnitude of increase in speciation rate across all 32 analyses (95% CI:  
272  $0.0557 \pm 0.0059$  species/MY) is significantly greater than the average decrease in extinction rate  
273 (95% CI:  $0.0145 \pm 0.0037$  species/MY), we conclude it is primarily differential speciation that is  
274 driving the increase in net-diversification in hybridizing lineages. Interpreted as a waiting time,  
275 this means that hybridizing species, on average, speciate every 9.2 (95% CI: 8.84 - 9.62) million  
276 years and go extinct every 160.7 (118.97 – 247.96) million years.

277 Analysis of the tree containing all species recovered strong signal of trait dependent  
278 diversification, with significant differences between hybridization or non-hybridizing lineages  
279 (as measured by empirical P-values) found between states for all five parameter estimates (Figs.  
280 2 & 3; Tables 1, 2, Supplementary Tables S6 – S7), regardless of whether the broad or narrow  
281 criterion was used. Speciation ( $\lambda$ ), net-diversification ( $r = \lambda - \mu$ ), and turnover rate ( $\tau = \lambda + \mu$ )  
282 were greater in hybridizing than non-hybridizing lineages, whereas extinction rate ( $\mu$ ) and  
283 extinction fraction ( $\epsilon = \mu \div \lambda$ ) were lower. Increases were on average 125% (95% CI: 117 -  
284 133%) for speciation, 576% (486 - 699%) for net diversification and 43% (41 - 45%) for  
285 turnover. In contrast, decreases were on average 305% (292 - 317%) for extinction and 945%  
286 (893 - 997%) for extinction fraction (Fig. 2). Additional analyses that assume different  
287 percentages of extant species hybridize produced qualitatively similar results and are discussed  
288 in the supplement (Supplementary Figs. S2-S4, Supplementary Tables S2-14).

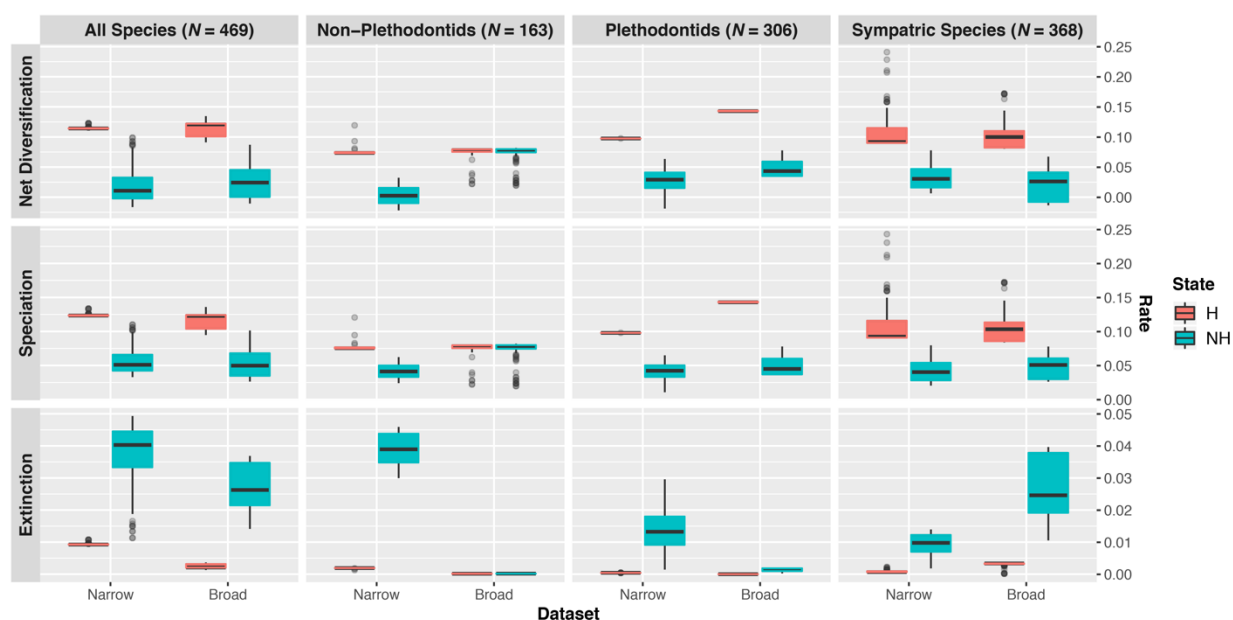

289  
290 **Figure 2. Model-averaged lineage-specific diversification rate estimates at the tips of the**  
291 **phylogeny assuming 20% of species hybridize.** Results using different trees are displayed by  
292 column, whereas results for different parameters are displayed by row. Hybridizing lineages (H)  
293 are displayed in red, whereas non-hybridizing (NH) lineages are displayed in blue. Results for both  
294 the narrow and broad datasets are shown; the narrow dataset includes only instances of  
295 contemporary hybridization in nature among natively distributed species, whereas the broad  
296 datasets includes instances of historical introgression and non-natural hybridization.  
297

298 Analysis of the tree including only sympatric taxa regardless of the hybridization  
299 criterion (narrow versus broad) datasets recovered patterns identical to those obtained using the  
300 complete phylogeny (Figs. 2 & 3; Tables 1, 2, Supplementary Tables S6-S7). Speciation rate,  
301 net-diversification rate, and turnover increased by 164% (135 - 196%;  $\lambda$ ), 244% (199 - 295%;  $r$ ),  
302 and 120% (98 - 142%;  $\tau$ ) respectively in hybridizing versus non-hybridizing lineages. In  
303 contrast, extinction rate and the extinction fraction decreased in hybridizing lineages by 1003%  
304 (864 - 1172%;  $\mu$ ) and 3653% (3319 - 4002%;  $\epsilon$ ) respectively.

305 Similarly, plethodontids exhibited the same patterns described above (Figs. 2 & 3; Tables  
306 1, 2, Supplementary Tables S6-S7). Hybridizing lineages experienced rates of speciation, net-  
307 diversification and turnover that were on average 139% (130 - 148%;  $\lambda$ ), 250% (224 - 281%;  $r$ ),  
308 and 78% (76 - 81%;  $\tau$ ) greater than those experienced by non-hybridizing lineages. Extinction

309 rate and extinction fraction were reduced by 3186% (3007 - 3366%;  $\mu$ ) and 9000% (8727 -  
 310 11073%;  $\epsilon$ ) in hybridizing lineages relative to non-hybridizing lineages.

| Definition of Hybridization | Dataset           | Model                                | Akaike Weight                  | Speciation   |              |              |              | Extinction      |                 |                 |                 | Net Diversification |                |              |              |
|-----------------------------|-------------------|--------------------------------------|--------------------------------|--------------|--------------|--------------|--------------|-----------------|-----------------|-----------------|-----------------|---------------------|----------------|--------------|--------------|
|                             |                   |                                      |                                | NH-A         | NH-B         | H-A          | H-B          | NH-A            | NH-B            | H-A             | H-B             | NH-A                | NH-B           | H-A          | H-B          |
| Narrow                      | All Species       | HISSE: No H-B, all transitions       | 0.715                          | 0.114        | 0.033        | 0.120        | NA           | 4.24E-7         | 0.041           | 0.010           | NA              | 0.114               | -0.008         | 0.110        | NA           |
|                             |                   | HISSE: No double transitions         | 0.263                          | 0.025        | 0.148        | 0.131        | 0.181        | 0.076           | 0.019           | 0.007           | 0.015           | -0.051              | 0.129          | 0.124        | 0.166        |
|                             | Sympatric Species | HISSE: All parameters free           | <b>0.980</b>                   | <b>0.086</b> | <b>0.019</b> | <b>0.255</b> | <b>0.078</b> | <b>1.77E-10</b> | <b>0.014</b>    | <b>0.002</b>    | <b>0.001</b>    | <b>0.086</b>        | <b>0.005</b>   | <b>0.253</b> | <b>0.077</b> |
|                             | Plethodontids     | HISSE: No H-B, all transitions       | 0.523                          | 0.063        | 0.009        | 0.099        | NA           | 1.31E-10        | 0.027           | 2.04E-10        | NA              | 0.063               | -0.018         | 0.099        | NA           |
|                             |                   | HISSE: No H-B, no double transitions | 0.475                          | 0.073        | 0.011        | 0.097        | NA           | 1.50E-10        | 0.001           | 0.033           | NA              | 0.073               | 0.010          | 0.064        | NA           |
|                             | Non-plethodontids | HISSE: No double transitions         | 0.648                          | <b>0.022</b> | <b>0.070</b> | <b>0.073</b> | <b>0.204</b> | <b>0.067</b>    | <b>0.003</b>    | <b>0.026</b>    | <b>0.001</b>    | <b>-0.044</b>       | <b>0.068</b>   | <b>0.047</b> | <b>0.203</b> |
|                             |                   | HISSE: No H-B, no double transitions | 0.206                          | 0.089        | 0.014        | 0.067        | NA           | 1.83E-10        | 0.010           | 1.37E-10        | NA              | 0.089               | 0.004          | 0.067        | NA           |
|                             |                   |                                      | HISSE: No H-B, all transitions | 0.085        | 0.017        | 0.092        | 0.071        | NA              | 0.031           | 0.058           | 0.002           | NA                  | -0.015         | 0.035        | 0.069        |
| Broad                       | All Species       | HISSE: No H-B, all transitions       | 0.631                          | <b>0.106</b> | <b>0.026</b> | <b>0.065</b> | <b>0.126</b> | <b>2.19E-10</b> | <b>0.025</b>    | <b>0.003</b>    | <b>2.59E-10</b> | <b>0.106</b>        | <b>1.00E-4</b> | <b>0.062</b> | <b>0.126</b> |
|                             |                   | HISSE: No H-B, no double transitions | 0.229                          | 0.089        | 0.014        | 0.067        | NA           | 1.83E-10        | 0.010           | 1.37E-10        | NA              | 0.089               | 0.004          | 0.067        | NA           |
|                             |                   | HISSE: No H-B, all transitions       | 0.130                          | 0.028        | 0.152        | 0.111        | NA           | 0.024           | 0.069           | 0.006           | NA              | 0.004               | 0.083          | 0.106        | NA           |
|                             | Sympatric Species | HISSE: No double transitions         | 0.637                          | <b>0.027</b> | <b>0.075</b> | <b>0.099</b> | <b>0.194</b> | <b>0.044</b>    | <b>0.013</b>    | <b>0.005</b>    | <b>4.00E-10</b> | <b>-0.018</b>       | <b>0.063</b>   | <b>0.094</b> | <b>0.194</b> |
|                             |                   | HISSE: All parameters free           | 0.361                          | 0.096        | 0.024        | 0.055        | 0.146        | 1.98E-10        | 0.032           | 1.13E-10        | 3.01E-10        | 0.096               | -0.008         | 0.055        | 0.146        |
|                             | Plethodontids     | HISSE: No H-B, no double transitions | 0.970                          | <b>0.036</b> | <b>0.085</b> | <b>0.143</b> | NA           | <b>0.002</b>    | <b>1.74E-10</b> | <b>2.95E-10</b> | NA              | <b>0.035</b>        | <b>0.085</b>   | <b>0.143</b> | NA           |
|                             | Non-plethodontids | CID-2: Three transitions, no double  | 0.949                          | <b>0.014</b> | <b>0.082</b> | <b>0.014</b> | <b>0.082</b> | <b>2.86E-11</b> | <b>1.69E-10</b> | <b>2.86E-11</b> | <b>1.69E-10</b> | <b>0.014</b>        | <b>0.082</b>   | <b>0.014</b> | <b>0.082</b> |

311  
312

313 **Table 2. Best-fit models assuming 20% of species hybridize.** Included are models that received  
 314 >5% Akaike weights for their respective analyses. For each dataset, the best fit model is bold.  
 315 Maximum-likelihood parameter estimates for speciation, extinction, and net diversification are  
 316 reported. Non-hybridizing is abbreviated as NH, Hybridizing as H; A and B indicate the two  
 317 hidden states.

318

319 In contrast, analysis of non-plethodontids revealed greater ambiguity as to the impact of

320 hybridization on diversification rates. Whereas the narrow dataset inferred trait-dependent

321 diversification in which hybridization drove increased diversification, the broad dataset did not

322 (Figs. 2 & 3; Tables 1, 2, Supplementary Tables S6-S7). Using the narrow dataset, all rates

323 except turnover were found to differ significantly (Supplementary Tables S6-S7, S13-S14).

324 Speciation rate and net diversification were 90% (75 - 107%;  $\lambda$ ) and 3355% (1444 - 26573%;  $r$ )

325 greater in hybridizing lineages, whereas extinction rate and extinction fraction were reduced by

326 1964% (1871 - 2062%;  $\mu$ ) and 4060% (3619 - 4545%;  $\epsilon$ ) in hybridizing lineages relative to non-

327 hybridizing lineages. Analysis of the broad dataset revealed no significant differences and

328 parameter estimates between hybridizing and non-hybridizing species.

329 Sister clade contrasts broadly supported results of the HiSSE analysis. That is,

330 hybridizing clades were found to have significantly greater species richness than non-hybridizing

331 clades for all datasets except for plethodontid salamanders. Details on significance of these tests

332 may be found in Supplemental Table S16.

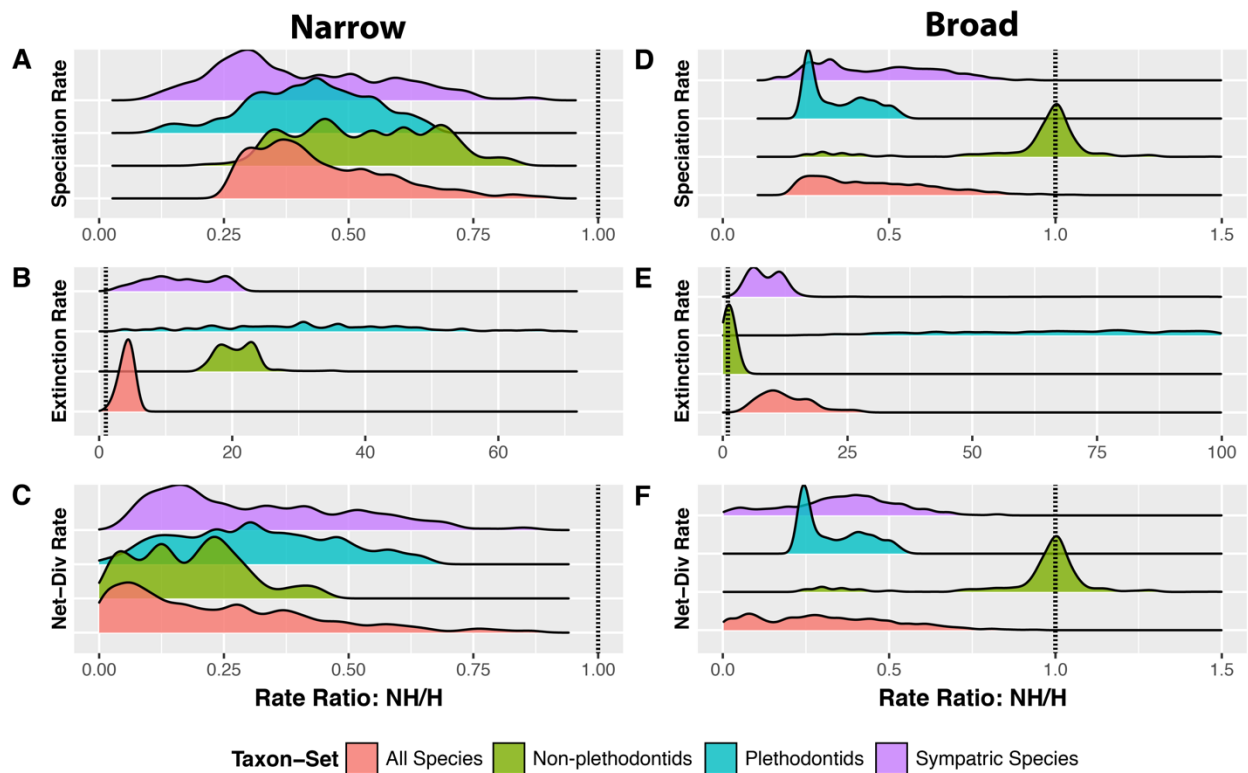

334 **Figure 3. Comparison of model averaged parameter estimates among character states.**  
335 Results reported here are those assuming 20% of species hybridize. A, B and C illustrate the  
336 distributions of non-hybridizing to hybridizing lineages diversification rates as estimated at the  
337 tips of the phylogeny using the narrow dataset, whereas D, E and F are those using the broad  
338 dataset. A value > 1 corresponds to a comparison in which non-hybridizing lineages experience  
339 rates greater than those of hybridizing lineages and vice-versa. Dotted vertical lines are placed at  
340 1, at which rates are equal among states.  
341

342

343 Rapidly diversifying species may have greater opportunity to hybridize due to an

344 associated increase in species richness. We did not recover evidence supporting this



345 interpretation. Both mean diversification rate (Adjusted  $R^2$ :  $\lambda = -0.095$ ;  $\mu = -0.084$ ;  $r = -0.092$ )  
346 and proportion of family hybridizing (Adjusted  $R^2 = -0.112$ ) are decoupled from family species  
347 richness, despite a significant correlation ( $P$ :  $\lambda = 0.0002$ ;  $\mu = 0.0004$ ;  $r = 0.0002$ ) between mean  
348 diversification rate and proportion family hybridizing (Adjusted  $R^2$ :  $\lambda = 0.822$ ;  $\mu = 0.786$ ;  $r =$   
349  $0.811$ ; Supplementary Fig. S8).

## 350 **Discussion**

351 Here, we show strong support that contemporary hybridization is correlated with elevated  
352 diversification rates in the order Caudata. Net-diversification of hybridizing species tends to be  
353 significantly greater than that of non-hybridizing species, driven primarily by a coincident  
354 increase in speciation and decrease in extinction rates (Figs. 2, 3; Tables 1, 2). The accelerated  
355 diversification of hybridizing salamanders appears ephemeral, however; rate differences rapidly  
356 become less pronounced deeper in the tree due to turnover of the hidden states (Fig. 1,  
357 Supplementary Figs. S9-S12). Possible mechanisms leading to this result include frequent range  
358 expansions and contractions (i.e. <sup>68</sup>) that have been documented in salamanders (e.g. <sup>69-71</sup>) and  
359 the process of reinforcement which has long been recognized to contribute to the diversification  
360 process<sup>14,72-74</sup>. We outline the potential contribution of each below.

361 Salamanders often exhibit substantial genetic differentiation at small geographic  
362 distances (e.g., 200m<sup>75</sup>) owing to limited dispersal abilities and low rates of gene flow<sup>76</sup>, thus  
363 leading to an abundance of opportunities to evolve in allopatry. Additionally, terrestrial species  
364 such as the *Plethodontid* salamanders of the southeastern United States experience elevational  
365 range expansions and contractions associated with climatic change<sup>71</sup>. Perhaps this combination  
366 of the primarily sessile nature of many salamander species and frequent repeated secondary  
367 contact leads to hybridization occurring regularly across evolutionary timescales. Under these

368 scenarios, hybridization may then play a creative evolutionary role in the diversification process  
369 similar to that observed in haplochromine cichlids<sup>24,25,77</sup>. Allopatric speciation of haplochromine  
370 cichlids has occurred in lakes that frequently have dried, split, and reformed, whereas sympatric  
371 speciation has occurred within lakes in which lineages exhibited extreme habitat specificity and  
372 have been reproductive isolated at fine spatial scales<sup>78</sup>. Under these circumstances, hybridization  
373 may have afforded genetic rescue from the consequences of small population size by providing  
374 increased standing genetic variation and thus expedited adaptation to novel stressors, as in Lake  
375 Victorian cichlids post-colonization<sup>25</sup>.

376         Such hypotheses of repeated contractions, expansions, and secondary contact of  
377 salamander populations have been well supported, across both North<sup>79–81</sup> and South America<sup>50,82</sup>,  
378 as well as in Europe<sup>83–85</sup>. Often associated with glaciation/deglaciation or orogeny of mountain  
379 ranges, geological events may act as species pumps for salamanders (i.e. <sup>86</sup>). However, while  
380 periodic geographic range expansion and contraction may initiate speciation, the reproductive  
381 isolation that evolves may be incomplete, predisposing the young species/diverging lineages to  
382 hybridization (i.e. <sup>23</sup>). As a result, hybridization may commonly occur in salamanders during  
383 periods of climatic fluctuations.

384         There is now clear evidence for latitudinal and elevational range shifts mediated by  
385 climate change<sup>87–91</sup> and a consequent increase in frequency of hybridization among previously  
386 isolated taxa<sup>92–95</sup>. An informed understanding of the influence of hybridization on  
387 macroevolutionary diversification may thus provide invaluable context for contemporary  
388 processes. This possibility of climate-change mediated hybridization has already been  
389 demonstrated in plethodontid salamanders (*P. shermani* & *P. teyahalee*<sup>71</sup>), as well as in  
390 ecologically divergent subspecies of salamandrid salamanders (*S. salamandra*<sup>96</sup>). Thus, it seems

391 likely that salamander species worldwide, particularly those found at high elevations due to their  
392 more limited potential geographic distributions, may experience a heightened frequency of  
393 hybridization as climate change advances. While generalizations regarding the outcome of  
394 hybridization should be made with caution<sup>30</sup>, our study indicates that perhaps speciation  
395 reversal<sup>97-99</sup> need not be the expectation. Rather, our study implies that hybridization may  
396 facilitate adaptation to novel conditions under climate change, leading to diversification of new  
397 salamander lineages.

398         Here, we show the novel result of a strong correlation of contemporary hybridization with  
399 elevated speciation and net diversification at a large taxonomic scale. However, reinforcement,  
400 defined as the strengthening of prezygotic reproductive isolation in sympatry<sup>14</sup>, is intrinsically  
401 intertwined with hybridization. Reinforcement has been documented both experimentally<sup>72</sup> and  
402 observationally<sup>74</sup> to accelerate the initiation and/or completion of the speciation process<sup>73,100,101</sup>.  
403 For instance, reinforcement is likely to play an important role in the speciation process due to  
404 strong interspecific sexual selection and mate choice in plethodontids<sup>102</sup>. Indeed, patterns of  
405 sexual isolation among populations of *Plethodon jordani* and *P. teyahalee* match expectations of  
406 reinforcement<sup>14</sup>, with sexual selection being stronger in sympatry than in allopatry<sup>103</sup>. Although  
407 we cannot currently quantify the contribution of reinforcement to diversification rate differences  
408 using our data, we urge further research measuring the degree of association between  
409 contemporaneous hybridization and reinforcement among taxa. Nonetheless, were reinforcement  
410 to play a role in the production of the patterns observed in this study, the very occurrence/process  
411 of hybridization would be the ultimate driver (i.e., cannot have reinforcement without  
412 hybridization). Under such a scenario, our study design is well-suited to identify such a signal.

413         Although a generative role of hybridization is robustly supported across three of our four

414 datasets, evidence for such a role outside of the Plethodontidae is more limited (Table 1,  
415 Supplementary Tables S2-S14). We find two possible explanations for this finding. Firstly, the  
416 positive association between diversification rates and hybridization may be unique to  
417 Plethodontid salamanders. However, family Plethodontidae is the largest extant family of  
418 salamanders, comprising approximately 2/3rds of the present diversity (471 of 716 species:  
419 [amphibiaweb.org](http://amphibiaweb.org)). Thus, our observation of hybridization facilitating the diversification process  
420 applies to the majority of salamanders and implies that, at a minimum, contemporaneous  
421 hybridization does not impede the diversification process of extant salamanders.

422         Secondly, it is highly probable that our analysis of non-plethodontid salamanders is  
423 lacking in power. SSE models have long been known to lose much of their power when dealing  
424 with small number of OTUs (trees < 300 taxa<sup>104</sup>). For example, for trees of 300 species, BiSSE  
425 attains a power of at most 50%, with power dropping below 15% of trees of 100 taxa<sup>104</sup>. Our  
426 phylogeny of non-plethodontids includes only 167 species; that we detected a positive  
427 relationship between hybridization and speciation rates using our narrow (most conservative)  
428 dataset despite such reduced power is a testament to the strength of the signal in our data.  
429 Whereas our larger datasets [complete (469 spp), sympatric (368 spp) and plethodontids (306  
430 spp)] have greater power, our lack of detection of a relationship between hybridization and  
431 diversification rates in non-plethodontids using our broad definition of hybridization is perhaps  
432 unsurprising, given the low power of the analysis (also see Supplementary Materials for an  
433 elaboration of power). Although the power of HiSSE under such scenarios has not been  
434 specifically established, accuracy of parameter estimation does decay with decreasing tree size<sup>61</sup>.  
435 Consequently, we cautiously interpret the results of the analysis of non-plethodontids (163 spp).  
436 Interestingly, sister clade comparisons consistently supported a positive relationship between

437 hybridization and species richness in non-plethodontids, despite not supporting such a  
438 relationship in plethodontids (Supplementary Table S16). These results are insensitive to branch-  
439 lengths, thereby ameliorating potential concerns related to the relationship between  
440 hybridization, branch-lengths, and diversification rates<sup>23</sup>.

441       Importantly, parameter estimates are largely reasonable. For instance, the greatest  
442 speciation rate inferred by any analysis (Plethodontids assuming 30% of taxa hybridize using the  
443 full tree: Supplementary Table S13), of 0.159 species/million years (MY) can be interpreted as a  
444 waiting time, such that on average, hybridizing species speciate every 6.29 MY. Extinction rates  
445 appear less reliably estimated however; some estimates functionally equal zero, leading to the  
446 large percent decrease in extinction rates observed for hybridizing relative to non-hybridizing  
447 species. In some cases, extinction rates in non-hybridizing taxa leads to negative net-  
448 diversification rates. That being said, averaged extinction rates across all analyses for hybridizing  
449 and non-hybridizing taxa led to more reasonable waiting times of 127.9 and 54.2 MY  
450 respectively. Further, recent studies have documented even more negative net-diversification  
451 rates than inferred herein<sup>105</sup>. Taken together, it appears that extinction plays an important role in  
452 the diversification of salamanders, leading to a reduction in net-diversification rates towards the  
453 present relative to hybridizing species.

454       An important question regarding the interpretation of our results is the relationship  
455 between lineage diversification rates, species richness, and opportunity to hybridize. Because the  
456 relationship between lineage diversification rate and opportunity to hybridize are not necessarily  
457 independent, rapidly diversifying lineages may simply have greater opportunity to hybridize due  
458 to increased diversification rates. Although a legitimate concern, we did not find evidence that  
459 the increased diversification rates we observe are due to increased family-level species richness

460 leading to increased opportunity to hybridize (Supplementary Fig. S8). Further, it is unlikely that  
461 non-random taxonomic sampling has biased our results, as there is no relationship between clade  
462 specific sampling fraction and frequency of hybridization (Supplementary Fig. S5).

463 Although the ability of methods to accurately infer extinction rates has been debated  
464 recently<sup>63,106,107</sup>, we emphasize that our results are robust to this concern. Our central result, that  
465 hybridizing lineages experience increased net diversification, is driven by both increased  
466 speciation rates and decreased extinction rates. Further, in nearly all cases, the magnitude of  
467 increase of speciation rate is greater than that of the decrease in extinction. Thus, our results are  
468 likely robust even to inaccuracies in the estimation of extinction rate.

469 An important distinction between our study and most previous studies investigating the  
470 influence that hybridization exerts on the diversification process is that of the time-scale at which  
471 hybridization is being assessed. Following Seehausen's<sup>6</sup> landmark paper "Hybridization and  
472 Adaptive Radiation," tests and discussion of his hypothesis, that ancient, widespread  
473 hybridization facilitates adaptive radiation became abundant in the literature (e.g. <sup>18,22,23,108,109</sup>).  
474 Whereas much of the subsequent studies focused on *ancient* hybridization, our study instead  
475 focuses on the effects of *contemporary* hybridization.

476 In a pertinent study, Wiens et al.<sup>23</sup>, tested the hybrid swarm hypothesis in the *Plethodon*  
477 *glutinosus* group (indicated in Fig. 1B) using two nuclear and two mitochondrial genes. They did  
478 not recover strongly supported evidence of genealogical discordance at the base of this group;  
479 these results were interpreted as not being supportive of Seehausen's hypothesis. Further, they  
480 identified a positive relationship between age of species and reproductive isolation. They argue  
481 that the observed relationship between diversification rate and hybridization in this group was a  
482 consequence of this relationship. Although a legitimate concern, we argue that this hybridization

483 is likely to still have biologically relevant consequences on diversification rates. Specifically,  
484 hybridization may either 1) facilitate the divergence of these young species i.e. through  
485 reinforcement/strengthening of prezygotic isolation, or 2) erode their divergence leading to  
486 species collapse. Whereas the former hypothesis predicts increased speciation rates, the latter  
487 predicts increased extinction rates. We find strong, consistent evidence in favor of the former.

488 We explicitly tested the hypothesis that contemporary hybridization plays a creative role  
489 in the diversification process in the broadest taxonomic and temporal scale study to date, and our  
490 observations strongly supported the predictions of this hypothesis. Specifically, hybridization  
491 was found to be correlated with both increased speciation rates and decreased extinction rates,  
492 resulting in increased net diversification rates relative to non-hybridizing lineages. Although  
493 other factors certainly contribute to the observed diversification dynamics, we have shown that  
494 hybridization plays a significant role, while accounting for hidden, correlated states in our  
495 analysis. Nearly all studies of hybridization have focused on individual case studies in which  
496 hybridization results in species collapse<sup>98</sup> or promotes diversification in a single species  
497 group<sup>12,13,22,27</sup>. Such studies are necessarily limited in the extent to which their results may be  
498 generalized<sup>30</sup>, particularly because results were equivocal across studies. Consequently, we  
499 advocate that our approach can be applied at broad taxonomic and evolutionary timescales to  
500 facilitate robust tests of the role of hybridization in the lineage diversification process. We  
501 anticipate our results are broadly generalizable to animal groups in which homoploid  
502 hybridization occurs because only 17 species of salamanders are known to be polyploid<sup>110</sup>, and  
503 our dataset includes only seven (*Ambystoma mexicanum*, *A. barbouri*, *A. jeffersonium*, *A.*  
504 *laterale*, *A. texanum*, *A. tigrinum*, and *Lissotriton vulgaris*) hybridizing polyploid taxa (none of  
505 which are plethodontids). Our study adds to the growing evidence that hybridization may fuel

506 rapid diversification (e.g. <sup>52</sup>) and is a compliment to speciation genomics studies characterizing  
507 the genomic basis of this process (e.g. <sup>17,111</sup>). Herein we have shown that hybridization may act  
508 as a generative force across a phylogenetic order, and additional studies at such  
509 macroevolutionary scales are needed to determine if this pattern holds more generally across the  
510 tree of life.

511

## 512 **Acknowledgements**

513 We thank Adam Leaché, David Weisrock & Maria Servedio for comments on earlier versions of  
514 the manuscript. We also thank Daniel Caetano, Josef Uyeda, Rosana Zenil-Ferguson and Jeremy  
515 Beaulieu for insightful discussions regarding the study and for technical advice. The authors  
516 have no conflicts of interest to declare.

517

## 518 **Funding**

519 This work was supported by NSF DEB-1316549 AS, NSF DEB 1208912 to LJH, and the  
520 WSU School of Biological Sciences Elling Endowment Fund to AHP.

## 521 **Author Contributions**

522 A.H.P. and J.E. conceived of and designed the study, A.H.P. conducted all analyses, and wrote  
523 the manuscript. A.H.P, M.J.M, B.E., J.E., L.J.H, and A.S. contributed to revisions of the  
524 manuscript. A.H.P., J.E., & M.J.M. conducted the literature review and B.E. contributed to early  
525 analyses.

526

527



## 528 References

- 529 1. Barton, N. H. & Hewitt, G. M. Analysis of hybrid zones. *Annu. Rev. Ecol. Syst.* **16**, 113–  
530 148 (1985).
- 531 2. Darwin, C. *On the Origin of Species by Means of Natural Selection.* (Murray. (1859).
- 532 3. Fisher, R. *The Genetical Theory of Natural Selection.* (Clarendon Press. (1930).
- 533 4. Mayr, E. *Animal species and evolution.* (Harvard University Press. (1963).
- 534 5. Futuyma, D. J. On the role of species in anagenesis. *Am. Nat.* **130**, 465–473 (1987).
- 535 6. Seehausen, O. Hybridization and adaptive radiation. *Trends Ecol. Evol.* **19**, 198–207  
536 (2004).
- 537 7. Grant, P. R. & Grant, B. R. Hybridization of bird species. *Science (80-. ).* **256**, 193–197  
538 (1992).
- 539 8. Seehausen, O., Van Alphen, J. J. & Witte, F. Cichlid fish diversity threatened by  
540 eutrophication that curbs sexual selection. *Science (80-. ).* **277**, 1808–1811 (1997).
- 541 9. Turelli, M., Barton, N. H. & Coyne, J. A. Theory and speciation. *Trends Ecol. Evol.* **16**,  
542 330–343 (2001).
- 543 10. Buerkle, C. A., Morris, R. J., Asmussen, M. A. & Rieseberg, L. H. The likelihood of  
544 homoploid hybrid speciation. *Heredity (Edinb).* **84**, 441–451 (2000).
- 545 11. Dowling, T. E. & Secor, C. L. the Role of Hybridization and Introgression in the  
546 Diversification of Animals. *Annu. Rev. Ecol. Syst.* **28**, 593–619 (1997).
- 547 12. Rieseberg, L. H., Archer, M. A. & Wayne, R. K. Transgressive segregation, adaptation  
548 and speciation. *Heredity (Edinb).* **83**, 363 (1999).
- 549 13. Soltis, P. S. & Soltis, D. E. The role of hybridization in plant speciation. *Annu. Rev. Plant*  
550 *Biol.* **60**, 561–588 (2009).
- 551 14. Coyne, J. A. & Orr, H. A. *Speciation.* (Sinauer Associates Sunderland. (MA, 2004).
- 552 15. Francillon-Vieillot, H., Arntzen, J. W. & Geraudie, J. Age, Growth and Longevity of  
553 Sympatric *Triturus cristatus*, *T. marmoratus* and Their Hybrids (Amphibia, Urodela): A  
554 Skeletochronological Comparison. *J. Herpetol.* **24**, 13 (1990).
- 555 16. Arntzen, J. W., Jehle, R., Bardakci, F., Burke, T. & Wallis, G. P. Asymmetric Viability of  
556 Reciprocal-Cross Hybrids Between Crested and Marbled News (*Triturus cristatus* and *T.*  
557 *marmoratus*). *Evolution (N. Y).* **63**, 1191–1202 (2009).
- 558 17. Marques, D. A., Meier, J. I. & Seehausen, O. *A combinatorial view on speciation and*  
559 *adaptive radiation.* (Trends in ecology & evolution, 2019).
- 560 18. Mallet, J. Hybrid speciation. *Nature* **446**, 279–83 (2007).
- 561 19. Mavárez, J. & Linares, M. Homoploid hybrid speciation in animals. *Mol. Ecol.* **17**, 4181–  
562 4185 (2008).
- 563 20. Gross, B. & Rieseberg, L. H. The ecological genetics of homoploid hybrid speciation. *J.*  
564 *Hered.* **96**, 241–252 (2005).
- 565 21. Schumer, M., Rosenthal, G. G. & Andolfatto, P. How common is homoploid hybrid  
566 speciation? *Evolution (N. Y).* **68**, 1553–1560 (2014).
- 567 22. Mavárez, J. *et al.* Speciation by hybridization in *Heliconius* butterflies. *Nature* **441**, 868–  
568 871 (2006).
- 569 23. Wiens, J. J., Engstrom, T. N. & Chippindale, P. T. Rapid diversification, incomplete  
570 isolation, and the “speciation clock” in North {A}merican salamanders (genus  
571 *Plethodon*): testing the hybrid swarm hypothesis of rapid radiation. *Evolution (N. Y).* **60**,  
572 2585–2603 (2006).
- 573 24. Keller, I. *et al.* Population genomic signatures of divergent adaptation, gene flow and

- 574 hybrid speciation in the rapid radiation of Lake Victoria cichlid fishes. *Mol. Ecol.* **22**,  
575 2848–2863 (2013).
- 576 25. Meier, J. I. *et al.* Ancient hybridization fuels rapid cichlid fish adaptive radiations. *Nat.*  
577 *Commun.* **8**, 14363 (2017).
- 578 26. Grant, P. R. & Grant, B. R. *No Title*. (Darwin’s finches on Daphne Major island.  
579 (Princeton University Press, 2014).
- 580 27. MacLeod, A. *et al.* Hybridization masks speciation in the evolutionary history of the  
581 Galápagos marine iguana. *Proc. R. Soc. B* **282**, 20150 (2015).
- 582 28. Yakimowski, S. B. & Rieseberg, L. H. The role of homoploid hybridization in evolution: a  
583 century of studies synthesizing genetics and ecology. *Am. J. Bot.* **101**, 1247–1258 (2014).
- 584 29. Seehausen, O. & others. Genomics and the origin of species. *Nat. Rev. Genet.* **15**, 176–192  
585 (2014).
- 586 30. Gompert, Z. & Buerkle, C. A. What, if anything, are hybrids: enduring truths and  
587 challenges associated with population structure and gene flow. *Evol. Appl.* **9**, 909–923  
588 (2016).
- 589 31. Berkeley, U. of C. *Species by the numbers*. (2018). at  
590 <<http://www.amphibiaweb.org/amphibian/speciesnums.html>>
- 591 32. Pyron, R. A. Biogeographic analysis reveals ancient continental vicariance and recent  
592 oceanic dispersal in amphibians. *Syst. Biol.* **63**, 779–797 (2014).
- 593 33. Wiens, J. J. Speciation and Ecology Revisited: Phylogenetic Niche Conservatism and the  
594 Origin of Species. *Evolution (N. Y.)*. **58**, 193–197 (2004).
- 595 34. Kozak, K. H., Weisrock, D. W. & Larson, A. Rapid lineage accumulation in a non-  
596 adaptive radiation: Phylogenetic analysis of diversification rates in eastern North  
597 American woodland salamanders (Plethodontidae: Plethodon). *Proc. R. Soc. B Biol. Sci.*  
598 **273**, 539–546 (2006).
- 599 35. Wake, D. B. Problems with Species: Patterns and Processes of Species Formation in  
600 Salamanders. *Ann. Missouri Bot. Gard.* **93**, 8–23 (2006).
- 601 36. Vences, M. & Wake, D. B. in *Amphibian Biology, Vol. 6, Systematics* (eds. Heatwole, H.  
602 H. & Tyler, M.) 2613–2669 (Surrey Beatty & Sons, Chipping Norton, Australia, 2007).
- 603 37. Wake, D. B. What Salamanders have Taught Us about Evolution. (2009).  
604 doi:10.1146/annurev.ecolsys.39.110707.173552
- 605 38. Blankers, T., Adams, D. C. & Wiens, J. J. Ecological radiation with limited morphological  
606 diversification in salamanders. *J. Evol. Biol.* **25**, 634–646 (2012).
- 607 39. Highton, R. Speciation in eastern North {A}merican salamanders of the genus Plethodon.  
608 *Annu. Rev. Ecol. Syst.* **26**, 579–600 (1995).
- 609 40. Highton, R. Geographic protein variation and speciation in the Plethodon dorsalis  
610 complex. *Herpetologica* **1997**, 345–356 (1997).
- 611 41. Highton, R. Geographic protein variation and speciation in the salamanders of the  
612 Plethodon cinereus group with the description of two new species. *Herpetologica* **1999**,  
613 43–90 (1999).
- 614 42. Highton, R. & Peabody, R. in *The Biology of Plethodontid Salamanders*. (eds. Bruce, R.  
615 C., Jaeger, R. G. & Houck, L. D.) 31–93 (Kluwer Academic/Plenum Publishers, 2000).
- 616 43. Wake, D. B. & Jockusch, E. L. in *The Biology of Plethodontid Salamanders* 95–119  
617 (Springer US, 2000). doi:10.1007/978-1-4615-4255-1\_4
- 618 44. Patton, A. *et al.* A New Green Salamander in the Southern Appalachians: Evolutionary  
619 History of Aneides aeneus and Implications for Management and Conservation with the

- 620 Description of a Cryptic Microendemic Species. *Copeia* **107**, (2019).
- 621 45. Rundell, R. J. & Price, T. D. Adaptive radiation, nonadaptive radiation, ecological  
622 speciation and nonecological speciation. *Trends Ecol. Evol.* **24**, 394–399 (2009).
- 623 46. Czekanski-Moir, J. E. & Rundell, R. J. The ecology of nonecological speciation and  
624 nonadaptive radiations. *Trends Ecol. Evol.* (2019).
- 625 47. Garcia-Paris, M., Good, D. A., Parra-Olea, G. & Wake, D. B. Biodiversity of Costa Rican  
626 salamanders: Implications of high levels of genetic differentiation and phylogeographic  
627 structure for species formation. *Proc. Natl. Acad. Sci.* **97**, 1640–1647 (2000).
- 628 48. Parra-Olea, G. & Wake, D. B. Extreme morphological and ecological homoplasy in  
629 tropical salamanders. *Proc. Natl. Acad. Sci. U. S. A.* **98**, 7888–7891 (2001).
- 630 49. Vieites, D. R., Min, M. S. & Wake, D. B. Rapid diversification and dispersal during  
631 periods of global warming by plethodontid salamanders. *Proc. Natl. Acad. Sci. U. S. A.*  
632 **104**, 19903–19907 (2007).
- 633 50. Parra-Olea, G., Windfield, J. C., Velo-Antón, G. & Zamudio, K. R. Isolation in habitat  
634 refugia promotes rapid diversification in a montane tropical salamander. *J. Biogeogr.* **39**,  
635 353–370 (2012).
- 636 51. Bryson, R. W. *et al.* Phylogenomic insights into the diversification of salamanders in the  
637 *Isthmura bellii* group across the Mexican highlands México View project Phylogeography  
638 and contact zones in *Ctenosaura pectinata* View project Phylogenomic insights into the  
639 diversification of salamanders in the *Isthmura bellii* group across the Mexican highlands.  
640 *Artic. Mol. Phylogenetics Evol.* (2018). doi:10.1016/j.ympev.2018.03.024
- 641 52. Gillespie, R. G. *et al.* Comparing Adaptive Radiations Across Space, Time, and Taxa. *J.*  
642 *Hered.* **89154**, 14853 (2020).
- 643 53. Stamatakis, A. RAxML-VI-HPC: maximum likelihood-based phylogenetic analyses with  
644 thousands of taxa and mixed models. *Bioinformatics* **22**, 2688–2690 (2006).
- 645 54. Smith, S. A. & O’meara, B. C. treePL: divergence time estimation using penalized  
646 likelihood for large phylogenies. *Bioinformatics* **28**, 2689–2690 (2012).
- 647 55. Paradis, E., Claude, J. & Strimmer, K. APE: analyses of phylogenetics and evolution in  
648 {R} language. *Bioinformatics* **20**, 289–290 (2004).
- 649 56. Liu, F. G. R., Moler, P. E. & Miyamoto, M. M. Phylogeography of the salamander genus  
650 *Pseudobranchius* in the southeastern United States. *Mol. Phylogenet. Evol.* **39**, 149–159  
651 (2006).
- 652 57. Fu, J. & Zeng, X. How many species are in the genus *Batrachuperus*? A  
653 phylogeographical analysis of the stream salamanders (family Hynobiidae) from  
654 southwestern China. *Mol. Ecol.* **17**, 1469–1488 (2008).
- 655 58. Yoshikawa, N., Matsui, M., Nishikawa, K., Misawa, Y. & Tanabe, S. Allozymic Variation  
656 in the Japanese Clawed Salamander, *Onychodactylus japonicus* (Amphibia: Caudata:  
657 Hynobiidae), with Special Reference to the Presence of Two Sympatric Genetic Types.  
658 *Zoolog. Sci.* **27**, 33–40 (2010).
- 659 59. Yoshikawa, N., Matsui, M. & Nishikawa, K. Genetic Structure and Cryptic Diversity of  
660 *Onychodactylus japonicus* (Amphibia, Caudata, Hynobiidae) in Northeastern Honshu,  
661 Japan, as Revealed by Allozymic Analysis. *Zoolog. Sci.* **29**, 229–237 (2012).
- 662 60. Yoshikawa, N. & Matsui, M. Two new Salamanders of the genus *Onychodactylus* from  
663 Eastern Honshu, Japan (Amphibia, Caudata, Hynobiidae). (2014).  
664 doi:10.11646/zootaxa.3866.1.3
- 665 61. Beaulieu, J. M. & O’Meara, B. C. Detecting hidden diversification shifts in models of trait

- 666 dependent speciation and extinction. *Syst. Biol.* **65**, 583–601 (2016).
- 667 62. Stadler, T. How can we improve accuracy of macroevolutionary rate estimates? *Syst. Biol.*  
668 **62**, 321–329 (2013).
- 669 63. Beaulieu, J. M. & O’Meara, B. C. Extinction can be estimated from moderately sized  
670 molecular phylogenies. **69**, 1036–1043 (2015).
- 671 64. Rabosky, D. L. & Goldberg, E. E. Model inadequacy and mistaken inferences of trait-  
672 dependent speciation. *Syst. Biol.* **64**, 340–55 (2015).
- 673 65. Caetano, D. S., O’Meara, B. C. & Beaulieu, J. M. Hidden state models improve state-  
674 dependent diversification approaches, including biogeographical models. *Evolution (N. Y.)*  
675 (2018).
- 676 66. Barraclough, T. G., Harvey, P. H. & Nee, S. Rate of rbcL gene sequence evolution and  
677 species diversification in flowering plants (angiosperms). Proceedings of the Royal  
678 Society of London. *Ser. B. Biol. Sci.* **263**, 589–591 (1996).
- 679 67. R Core Team. R: A Language and Environment for Statistical Computing. (2018). at  
680 <<https://www.r-project.org/>>
- 681 68. Hewitt, G. M. Some genetic consequences of ice ages, and their role in divergence and  
682 speciation. *Biol. J. Linn. Soc.* **58**, 247–276 (1996).
- 683 69. Kozak, K. H., Blaine, R. A. & Larson, A. Gene lineages and eastern North {A}merican  
684 palaeodrainage basins: phylogeography and speciation in salamanders of the Eurycea  
685 bislineata species complex. *Mol. Ecol.* **15**, 191–207 (2006).
- 686 70. Shepard, D. B. & Burbrink, F. T. Phylogeographic and demographic effects of Pleistocene  
687 climatic fluctuations in a montane salamander, *Plethodon fourchensis*. *Mol. Ecol.* **18**,  
688 2243–2262 (2009).
- 689 71. Walls, S. C. The role of climate in the dynamics of a hybrid zone in Appalachian  
690 salamanders. *Glob. Chang. Biol.* **15**, 1903–1910 (2009).
- 691 72. Rice, W. R. & Hostert, E. E. Laboratory experiments on speciation: what have we learned  
692 in 40 years? **47**, 1637–1653 (1993).
- 693 73. Servedio, M. R. & Noor, M. A. The role of reinforcement in speciation: theory and data.  
694 *Annu. Rev. Ecol. Evol. Syst.* **34**, 339–364 (2003).
- 695 74. Matute, D. R. & Ortiz-Barrientos, D. Speciation: The strength of natural selection driving  
696 reinforcement. *Curr. Biol.* **24**, 955–957 (2014).
- 697 75. Zamudio, K. R. & Wiczorek, A. M. Fine-scale spatial genetic structure and dispersal  
698 among spotted salamander (*Ambystoma maculatum*) breeding populations. *Mol. Ecol.* **16**,  
699 257–274 (2007).
- 700 76. Emel, S. L. & Storfer, A. A decade of amphibian population genetic studies: synthesis and  
701 recommendations. *Conserv. Genet.* **13**, 1685–1689 (2012).
- 702 77. Meier, J. I. *et al.* The coincidence of ecological opportunity with hybridization explains  
703 rapid adaptive radiation in Lake Mweru cichlid fishes. *Nat. Commun.* **10**, (2019).
- 704 78. Rico, C. & Turner, G. F. Extreme microallopatric divergence in a cichlid species from  
705 Lake Malawi. *Mol. Ecol.* **11**, 1585–1590 (2002).
- 706 79. Church, S. A., Kraus, J. M., Mitchell, J. C., Church, D. R. & Taylor, D. R. Evidence for  
707 Multiple Pleistocene Refugia in the Postglacial Expansion of the Eastern Tiger  
708 salamander, *Ambystoma Tigrinum Tigrinum*. *Evolution (N. Y.)*. **57**, 372–383 (2003).
- 709 80. Crespi, E. J., Rissler, L. J. & Browne, R. A. Testing Pleistocene refugia theory:  
710 phylogeographical analysis of *Desmognathus wrighti*, a high-elevation salamander in the  
711 southern Appalachians. *Mol. Ecol.* **12**, 969–984 (2003).

- 712 81. Steele, C. A. & Storfer, A. Phylogeographic incongruence of codistributed amphibian  
713 species based on small differences in geographic distribution. *Mol. Phylogenet. Evol.* **43**,  
714 468–479 (2007).
- 715 82. Zamudio, K. R. & Savage, W. K. Historical Isolation, Range Expansion, and Secondary  
716 Contact of Two Highly Divergent Mitochondrial Lineages in Spotted Salamanders  
717 (*Ambystoma maculatum*). *Evolution (N. Y.)* **57**, 1631–1652 (2003).
- 718 83. Alexandrino, J., Froufe, E., Arntzen, J. W. & Ferrand, N. Genetic subdivision, glacial  
719 refugia and postglacial recolonization in the golden-striped salamander, *Chioglossa*  
720 *lusitanica* (Amphibia: Urodela). *Mol. Ecol.* **9**, 771–781 (2000).
- 721 84. Steinfartz, S., Veith, M. & Tautz, D. Mitochondrial sequence analysis of *Salamandra* taxa  
722 suggests old splits of major lineages and postglacial recolonizations of Central Europe  
723 from distinct source populations of *Salamandra salamandra*. *Mol. Ecol.* **9**, 397–410  
724 (2000).
- 725 85. Mattoccia, M., Marta, S., Romano, A. & Sbordoni, V. Phylogeography of an Italian  
726 endemic salamander (genus *Salamandrina*): glacial refugia, postglacial expansions, and  
727 secondary contact. *Biol. J. Linn. Soc.* **104**, 903–992 (2011).
- 728 86. Kozak, K. H. & Wiens, J. J. Niche conservatism drives elevational diversity patterns in  
729 Appalachian salamanders. *Am. Nat.* **176**, 40–54 (2010).
- 730 87. Parmesan, C. & Yohe, G. A globally coherent fingerprint of climate change impacts  
731 across natural systems. *Nature* **421**, 37–42 (2003).
- 732 88. Root, T. L., Hall, P., K. R., S. & S. H. Rosenzweig C. & Pounds, J. A. Fingerprints of  
733 global warming on wild animals and plants. *Nature* **421**, 57–60 (2003).
- 734 89. Kelly, A. E. & Goulden, M. L. Rapid shifts in plant distribution with recent climate  
735 change. *Proc. Natl. Acad. Sci.* **105**, 11823–11826 (2008).
- 736 90. Chen, I. C., Hill, J. K., Ohlemüller, R., Roy, D. B. & Thomas, C. D. Rapid range shifts of  
737 species associated with high levels of climate warming. *Science (80-. )*. **333**, 1024–1026  
738 (2011).
- 739 91. Elsen, P. R. & Tingley, M. W. Global mountain topography and the fate of montane  
740 species under climate change. *Nat. Clim. Chang.* **5**, 772–776 (2015).
- 741 92. Garroway, C. J. *et al.* Climate change induced hybridization in flying squirrels. *Glob.*  
742 *Chang. Biol.* **16**, 113–121 (2010).
- 743 93. Hoffmann, A. A. & Sgrò, C. M. Climate change and evolutionary adaptation. *Nature* **470**,  
744 479–85 (2011).
- 745 94. Chunco, A. J. Hybridization in a warmer world. *Ecol. Evol.* **4**, 2019–2031 (2014).
- 746 95. McQuillan, M. A. & Rice, A. M. Differential effects of climate and species interactions on  
747 range limits at a hybrid zone: potential direct and indirect impacts of climate change. *Ecol.*  
748 *Evol.* **5**, 5120–5137 (2015).
- 749 96. Pereira, R. J., Martínez-Solano, I. & Buckley, D. Hybridization during altitudinal range  
750 shifts: nuclear introgression leads to extensive cyto-nuclear discordance in the fire  
751 salamander. *Mol. Ecol.* **25**, 1551–1565 (2016).
- 752 97. Seehausen, O. Conservation: losing biodiversity by reverse speciation. *Curr. Biol.* **16**,  
753 334–R337 (2006).
- 754 98. Seehausen, O., Takimoto, G., Roy, D. & Jokela, J. Speciation reversal and biodiversity  
755 dynamics with hybridization in changing environments. *Mol. Ecol.* **17**, 30–44 (2008).
- 756 99. Vonlanthen, P. & others. Eutrophication causes speciation reversal in whitefish adaptive  
757 radiations. *Nature* **482**, 357–362 (2012).

- 758 100. Hoskin, C. J., Higgie, M., McDonald, K. R. & Moritz, C. Reinforcement drives rapid  
759 allopatric speciation. *Nature* **437**, 1353–1356 (2005).
- 760 101. Pfennig, K. S. Reinforcement as an initiator of population divergence and speciation.  
761 *Curr. Zool.* **62**, 145–154 (2016).
- 762 102. Arnold, S. J., Reagan, N. L. & Verrell., P. A. Reproductive isolation and speciation in  
763 plethodontid salamanders. *Herpetologica* **49**, 216–228 (1993).
- 764 103. Reagan, N. L. *Evolution of sexual isolation in salamanders of the genus Plethodon*  
765 *(Doctoral dissertation)*. (University of Chicago, 1992).
- 766 104. Davis, M. P., Midford, P. E. & Maddison, W. Exploring power and parameter estimation  
767 of the BiSSE method for analyzing species diversification. *BMC Evol. Biol.* **13**, 38 (2013).
- 768 105. Freyman, W. A. & Höhna, S. Stochastic character mapping of state-dependent  
769 Diversification reveals the tempo of evolutionary decline in self-compatible Onagraceae  
770 lineages. *Syst. Biol.* **68**, 505–519 (2019).
- 771 106. Rabosky, D. L. Extinction rates should not be estimated from molecular phylogenies.  
772 *Evolution (N. Y.)*. **64**, 1816–1824 (2010).
- 773 107. Rabosky, D. L. Challenges in the estimation of extinction from molecular phylogenies: a  
774 response to Beaulieu and O’Meara. *Evolution (N. Y.)*. **70**, 218–228 (2016).
- 775 108. Kearney, M. Hybridization, glaciation and geographical parthenogenesis. *Trends Ecol.*  
776 *Evol.* **20**, 495–502 (2005).
- 777 109. Willis, B. L., van Oppen, M. J., Miller, D. J., Vollmer, S. V & Ayre, D. J. The role of  
778 hybridization in the evolution of reef corals. *Annu. Rev. Ecol. Evol. Syst* **37**, 489–517  
779 (2006).
- 780 110. Schmid, M., Evans, B. J. & Bogart, J. P. Polyploidy in Amphibia. *Cytogenetic and*  
781 *Genome Research* **145**, 315–330 (2015).
- 782 111. Runemark, A., Vallejo-Marin, M. & Meier, J. I. Eukaryote hybrid genomes. *PLOS Genet.*  
783 **15**, e1008404 (2019).
